# Supplementary material for: Investigation of Interactive Activity of Electro-Acupuncture on Pharmacokinetics of Sildenafil and Their Synergistic Effect on Penile Blood Flow in Rats
Source: Int J Mol Sci. 2018 Jul 24;19(8):2153. doi: 10.3390/ijms19082153 (PMC6121473; doi:10.3390/ijms19082153)
Supplement: Supplementary file 1 [file ijms-19-02153-s001.pdf]

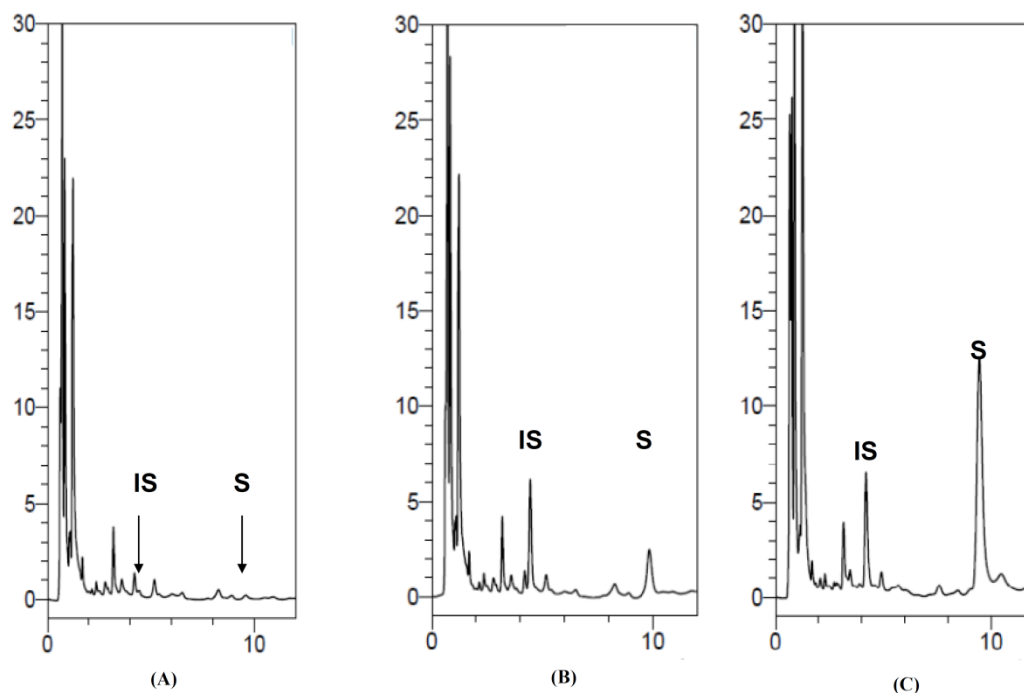

**Figure S1.** UPLC chromatograms of intravenous sildenafil after administration of electro-acupuncture (EA). (A) blank plasma, (B) blank plasma spiked with sildenafil (1 µg/mL), (C) Plasma sample after sildenafil administration (10mg/Kg, i.v.) + low frequency EA (1.5 mA, 2 Hz) administration. IS, Internal Standard (*p*-hydroxybenzoate); S, sildenafil.

**Table S1.** Precision (%R.S.D.) and accuracy (% Bias) data for sildenafil.

| Nominal concentration (µg/mL) | Observed concentration (µg/mL) | RSD (%) | Accuracy (%) |
|-------------------------------|--------------------------------|---------|--------------|
| <b>Inter-day</b>              |                                |         |              |
| 0.1                           | 0.12 ± 0.02                    | 15.9    | 15.4         |
| 0.5                           | 0.50 ± 0.02                    | 4.81    | 0.54         |
| 1                             | 0.97 ± 0.02                    | 2.38    | 3.29         |
| 5                             | 4.93 ± 0.10                    | 1.98    | 1.44         |
| 10                            | 10.02 ± 0.05                   | 0.52    | 0.24         |
| <b>Intra-day</b>              |                                |         |              |
| 0.1                           | 0.12 ± 0.02                    | 14.6    | 19.2         |
| 0.5                           | 0.45 ± 0.01                    | 2.98    | 9.26         |
| 1                             | 0.94 ± 0.02                    | 2.27    | 5.78         |
| 5                             | 5.15 ± 0.07                    | 1.40    | 3.08         |
| 10                            | 9.93 ± 0.03                    | 0.34    | 9.69         |

Data are expressed as mean ± S.D., (n = 6). The relative standard deviation (RSD) was calculated from the observed concentration as follows:  $RSD (\%) = [\text{Standard deviation (S.D)} / \text{Observed concentration (C}_{\text{obs}})] \times 100$ . The accuracy was estimated by using mean value of nominal concentration ( $C_{\text{nom}}$ ) and observed concentration ( $C_{\text{obs}}$ ) as following:  $\text{Accuracy} (\%) = [(C_{\text{nom}} - C_{\text{obs}}) / C_{\text{nom}}] \times 100 \%$ .
